# Supplementary material for: Cripto-1 Plasmid DNA Vaccination Targets Metastasis and Cancer Stem Cells in Murine Mammary Carcinoma
Source: Oxford University Press journal article supplement (doi:10.1158/2326-6066.cir-17-0572), 2018-08-24
Supplement: 23266066cir170572-sup-190555_3_supp_4930039_pcqh1m.docx [file 23266066cir170572-sup-190555_3_supp_4930039_pcqh1m.docx]

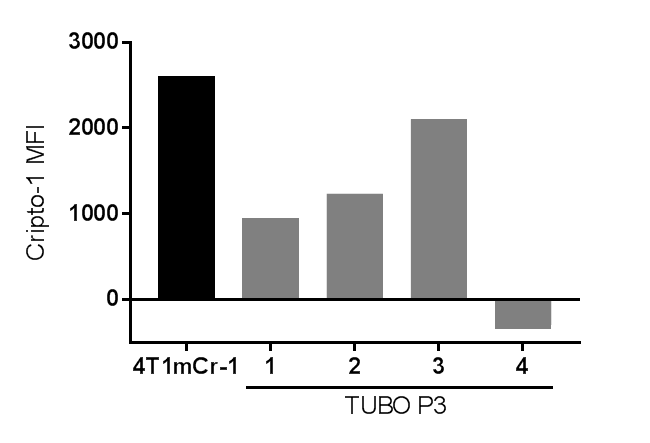


**Supplementary Fig. S7: Cripto-1 expression on TUBO P3 cells.**

TUBO P3 cells from 4 independent cultures were stained following flow cytometry staining protocol. Cripto-1 expression was detected by flow cytometry and mean fluorescent intensity calculated. Cripto-1 MFI was calculated: MFI (pmCr-1) – MFI (pVAX).
