# Supplementary material for: Cripto-1 Plasmid DNA Vaccination Targets Metastasis and Cancer Stem Cells in Murine Mammary Carcinoma
Source: Oxford University Press journal article supplement (doi:10.1158/2326-6066.cir-17-0572), 2018-08-24
Supplement: 23266066cir170572-sup-190555_3_supp_4930040_pcqq1m.docx [file 23266066cir170572-sup-190555_3_supp_4930040_pcqq1m.docx]

|  | antigen | conjugation | host | clonality | clone | isotype | company | catalog number |
| --- | --- | --- | --- | --- | --- | --- | --- | --- |
| **Flow conjugated** | human Cripto-1 | PE | mouse | monoclonal | #89633 | IgG1 | R&D | FAB2772P |
|  | mouse IgG | PE | goat | polyclonal |  | F(ab')2 | Jackson Immuno Research | 115-116-071 |
|  | mouse IgG | FITC | rat | ployclonal | Poly4060 |  | Biolegend | 406001 |
|  | mouse IgG1 | FITC | rat |  | RMG1-1 |  | Biolegend | 406605 |
|  | mouse IgG2a | FITC | rat |  | RMG2a-62 |  | Biolegend | 407105 |
|  | mouse IgG2b | FITC | rat |  | RMG2b-1 |  | Biolegend | 406705 |
|  |  |  |  |  |  |  |  |  |
| **WB** | mouse IgG | HRP | goat | polyclonal |  | F(ab')2 | Invitrogen | A24524 |
|  | rabbit IgG | HRP | goat | polyclonal |  | F(ab')2 | Invitrogen | A24531 |
|  | β-actin |  | mouse | monoclonal | AC-15 | IgG1 | Sigma | A5441 |
|  | Cripto-1 |  | rabbit | polyclonal |  |  | Rockland | 600-401-997 |

**Supplementary Table S1: Summary of all antibodies**
